# Supplementary material
Source: publisher site journal article supplement (https://www.spandidos-publications.com/7698/downloadSupplementary)
Supplement: Supplementary file 1 [file downloadSupplementary]

Table SII. Comparisons between previous research and the present study.

| First author/s,<br>year   | Topic                                   | Cancer | Screening<br>gene method   | Modeling<br>method   | Set      | Training                     | Test                   | ROC (1, 3 and 5 years)                                                                               |                                                                                                          | TME                                                             | TMB | IC <sub>50</sub>                                                                                      | Experimental<br>validation | (Refs.) |
|---------------------------|-----------------------------------------|--------|----------------------------|----------------------|----------|------------------------------|------------------------|------------------------------------------------------------------------------------------------------|----------------------------------------------------------------------------------------------------------|-----------------------------------------------------------------|-----|-------------------------------------------------------------------------------------------------------|----------------------------|---------|
|                           |                                         |        |                            |                      |          |                              |                        | Training                                                                                             | Test                                                                                                     |                                                                 |     |                                                                                                       |                            |         |
| Zhao <i>et al</i> , 2024  | Hypoxia and mitochondrial-related genes | LUAD   | WGCNA                      | LASSO                | TCGA 094 | GSE31210; GSE72              | 0.721, 0.711 and 0.671 | GSE31210: 0.756, 0.641 and 0.669; GSE72094: 0.672, 0.670 and 0.673                                   | ssGSEA (checkpoint expression, 13 immune-related pathways)                                               | Waterfall plot; TMB-related KM                                  | Yes | None                                                                                                  | (21)                       |         |
| Jiang <i>et al</i> , 2023 | Cuproptosis-anoikis-related genes       | LUAD   | Pearson correlation (>0.3) | LASSO                | TCGA     | GSE26939                     | 0.732, 0.743 and 0.712 | 0.663, 0.614 and 0.599                                                                               | CIBERSORT (proportion of 22 types of infiltrating immune cell)); Estimate score                          | Waterfall plot; Correlations between risk score and TMB         | Yes | Immunohistochemistry (HPA online database)                                                            | (26)                       |         |
| Present study             | Cuproptosis-related mitochondrial genes | LUAD   | Pearson correlation (>0.3) | 117 machine learning | TCGA     | GSE26939; GSE31210; GSE72094 | 0.743, 0.741 and 0.693 | GSE26939: 0.811 and 0.714, 0.708; GSE31210: 0.824, 0.657 and 0.732; GSE72094: 0.714, 0.671 and 0.769 | ssGSEA (checkpoint expression, immune-related pathways); Estimate score; CIBERSORT (Fig. S1); TIDE score | Waterfall plot; TMB in high and low risk groups; TMB-related KM | Yes | RT-qPCR; CCK-8 assay; colony formation assay; Transwell assay; Mitochondrial immunofluorescence assay | -                          |         |

ROC, receiver operating characteristic; TME, tumor microenvironment; TMB, tumor mutational burden; LUAD, lung adenocarcinoma; WGCNA, weighted gene co-expression network analysis; LASSO, least absolute shrinkage and selection operator; TCGA, The Cancer Genome Atlas; ssGSEA, single-sample gene set enrichment analysis; KM, Kaplan-Meier; TIDE, Tumor Immune Dysfunction and Exclusion; HPA, Human Protein Atlas; RT-qPCR, reverse transcription-quantitative PCR; CCK-8, Cell Counting Kit-8.
